# Supplementary material for: Testing the Tropical Niche Conservatism Hypothesis: Climatic Niche Evolution of Escallonia Mutis ex L. F. (Escalloniaceae)
Source: MDPI journal article supplement (doi:10.3390/plants13010133), 2024-01-03
Supplement: s1 [file s1]

**Table S1:** Voucher specimens of *Escallonia* genus and outgroups obtained by Zapata (2013): collection (the herbarium where it was deposited is indicated in parentheses), locality of collection, geographic coordinates in decimal degrees, and GenBank numbers of Nia gen.

| Especie                  | Código            | Localidad                   | Latitud | Longitud | Gen Nia  |
|--------------------------|-------------------|-----------------------------|---------|----------|----------|
| <i>E. alpina</i>         | FZ331 (MO, CONC)  | Santiago, Chile             | -33.30  | -70.32   | KC355564 |
| <i>E. angustifolia</i>   | FZ324 (MO, HUSA)  | Arequipa, Perú              | -16.56  | -71.45   | KC355566 |
| <i>E. bifida</i>         | WP169 (MO, SPF)   | Minas Gerais, Brasil        | -22.49  | -45.08   | KC355572 |
| <i>E. calcottiae</i>     | FZ127A (MO)       | Valparaíso, Chile           | -33.64  | -78.83   | KC355575 |
| <i>E. cordobensis</i>    | JH3286 (MO, L, K) | Córdoba, Argentina          | -30.85  | -64.50   | KC355576 |
| <i>E. discolor</i>       | FZ84 (ANDES)      | Cundinamarca, Colombia      | 4.99    | -74.15   | KC355578 |
| <i>E. farinacea</i>      | WP152 (MO, SPF)   | Sao Paulo, Brasil           | -22.76  | -45.55   | KC355583 |
| <i>E. florida</i>        | FZ431 (MO, CONC)  | Araucanía, Chile            | -38.58  | -71.63   | KC355584 |
| <i>E. gayana</i>         | PB904 (E, CONC)   | Araucanía, Chile            | -38.47  | -71.72   | KC355587 |
| <i>E. herrerae</i>       | FZ190 (MO, MOL)   | Cuzco, Perú                 | -13.47  | -72.50   | KC355588 |
| <i>E. hypoglaucia</i>    | FZ304 (MO, LPB)   | Santa Cruz, Bolivia         | -17.83  | -64.72   | KC355590 |
| <i>E. illinita</i>       | FZ127 (MO, CONC)  | Santiago, Chile             | -33.01  | -70.90   | KC355595 |
| <i>E. laevis</i>         | LF87 (MO, SPF)    | Paraná, Brasil              | -25.24  | -48.83   | KC355599 |
| <i>E. ledifolia</i>      | LF59 (MO, SPF)    | Santa Catarina, Brasil      | -27.84  | -49.65   | KC355601 |
| <i>E. leucantha</i>      | FZ383 (MO, CONC)  | Bío-Bío, Chile              | -37.81  | -73.14   | KC355605 |
| <i>E. megapotamica</i>   | LF72 (MO, SPF)    | Santa Catarina, Brasil      | -26.10  | -49.83   | KC355608 |
| <i>E. micrantha</i>      | FZ242 (MO, MOL)   | Cajamarca, Perú             | -7.08   | -79.05   | KC355610 |
| <i>E. millegrana</i>     | FZ289 (MO, LPB)   | Cochabamba, Bolivia         | -17.84  | -65.46   | KC355611 |
| <i>E. myrtilloides</i>   | BH23603 (INB)     | San José, Costa Rica        | 9.60    | -83.83   | KC355613 |
| <i>E. myrtoidea</i>      | FZ497 (MO, CONC)  | Maule, Chile                | -35.92  | -71.37   | KC355620 |
| <i>E. paniculata</i>     | FZ245 (MO, MOL)   | Piura, Perú                 | -5.37   | -79.58   | KC355623 |
| <i>E. pendula</i>        | FZ206 (MO, MOL)   | Cajamarca, Perú             | -6.87   | -78.11   | KC355626 |
| <i>E. petrophila</i>     | LF44 (MO, SPF)    | Santa Catarina, Brasil      | -28.06  | -49.37   | KC355630 |
| <i>E. piurensis</i>      | FZ239 (MO, MOL)   | Cajamarca, Perú             | -7.33   | -78.81   | KC355631 |
| <i>E. polifolia</i>      | FZ224 (MO, MOL)   | Amazonas, Perú              | -6.71   | -77.85   | KC355632 |
| <i>E. pulverulenta</i>   | FZ361 (MO, CONC)  | Bío-Bío, Chile              | -37.69  | -72.73   | KC355636 |
| <i>E. resinosa</i>       | FZ182 (MO, MOL)   | Cuzco, Perú                 | -13.18  | -72.29   | KC355637 |
| <i>E. reticulata</i>     | AL360 (MO)        | Chuquisaca, Bolivia         | -19.81  | -63.72   | KC355640 |
| <i>E. revoluta</i>       | FZ359 (MO, CONC)  | Bío-Bío, Chile              | -37.64  | -72.79   | KC355643 |
| <i>E. rosea</i>          | FZ531 (MO, CONC)  | Los Ríos, Chile             | -40.18  | -73.44   | KC355652 |
| <i>E. rubra</i>          | FZ406 (MO, CONC)  | Bío-Bío, Chile              | -37.39  | -71.46   | KC355656 |
| <i>E. schreiteri</i>     | NL58 (MO)         | Santa Cruz, Bolivia         | -17.86  | -64.63   | KC355658 |
| <i>E. serrata</i>        | KFC1662A (MO)     | Tierra del Fuego, Argentina | -54.94  | -66.93   | KC355660 |
| <i>E. tucumanensis</i>   | FZ10377C (MO, SI) | Salta, Argentina            | -22.33  | -64.72   | KC355663 |
| <i>E. virgata</i>        | FZ370 (MO, CONC)  | Bío-Bío, Chile              | -37.81  | -73.02   | KC355664 |
| <i>Forgesia racemosa</i> | JF425 (REU)       | Eden, Réunion               | -21.00  | 55.63    | KC355671 |
| <i>Valdivia gayana</i>   | FZ99 (MO, CONC)   | Los Lagos, Chile            | -39.88  | -73.42   | KC355672 |

**Table S2:** Minimum, maximum and average height values in which each species inhabits, where S the South Andes; C, The Central Andes; B, Brazil; and N to the North and Central Andes.

| <b>Especie</b>         | <b>Altura mínima</b> | <b>Altura máxima</b> | <b>Altura promedio</b> | <b>Zona</b> |
|------------------------|----------------------|----------------------|------------------------|-------------|
| <i>E. alpina</i>       | 31                   | 2787                 | 1419.3                 | S           |
| <i>E. angustifolia</i> | 1130                 | 3940                 | 2481.3                 | C           |
| <i>E. bifida</i>       | 7                    | 1863                 | 1008.7                 | B           |
| <i>E. callcottiae</i>  | 5                    | 428                  | 239.4                  | S           |
| <i>E. cordobensis</i>  | 298                  | 2005                 | 855                    | C           |
| <i>E. discolor</i>     | 203                  | 3840                 | 2449.6                 | N           |
| <i>E. farinacea</i>    | 603                  | 1897                 | 968.7                  | B           |
| <i>E. florida</i>      | 157                  | 2251                 | 1091.7                 | S           |
| <i>E. gayana</i>       | 47                   | 1184                 | 561.6                  | S           |
| <i>E. herrerae</i>     | 125                  | 3949                 | 2811.2                 | C           |
| <i>E. hypoglauca</i>   | 203                  | 3470                 | 2260.5                 | C           |
| <i>E. illinita</i>     | 61                   | 3694                 | 1459.4                 | S           |
| <i>E. laevis</i>       | 9                    | 2503                 | 1284.9                 | B           |
| <i>E. ledifolia</i>    | 768                  | 1639                 | 1047.2                 | B           |
| <i>E. leucantha</i>    | 27                   | 1824                 | 588.7                  | S           |
| <i>E. megapotamica</i> | 2                    | 1318                 | 678.6                  | B           |
| <i>E. micrantha</i>    | 196                  | 3406                 | 2427.9                 | N, C        |
| <i>E. millegrana</i>   | 146                  | 2865                 | 1669.2                 | C           |
| <i>E. myrtilloides</i> | 27                   | 4816                 | 3029.5                 | N, C        |
| <i>E. myrtoidea</i>    | 225                  | 3396                 | 1585.8                 | S           |
| <i>E. paniculata</i>   | 90                   | 3482                 | 2132.9                 | N, C        |
| <i>E. pendula</i>      | 159                  | 4209                 | 2241.6                 | N, C        |
| <i>E. petrophila</i>   | 2                    | 1415                 | 766.2                  | B           |
| <i>E. piurensis</i>    | 1588                 | 3036                 | 2328.9                 | C           |
| <i>E. polifolia</i>    | 1938                 | 3576                 | 2709.3                 | C           |
| <i>E. pulverulenta</i> | 7                    | 1824                 | 585.3                  | S           |
| <i>E. resinosa</i>     | 203                  | 4733                 | 3162.5                 | N, C        |
| <i>E. reticulata</i>   | 614                  | 2385                 | 1654.7                 | C           |
| <i>E. revoluta</i>     | 3                    | 1827                 | 713.9                  | S           |
| <i>E. rosea</i>        | 27                   | 1705                 | 1000.2                 | S           |
| <i>E. rubra</i>        | 0                    | 1824                 | 687.5                  | S           |
| <i>E. schreiteri</i>   | 1171                 | 3532                 | 2193                   | N, C        |
| <i>E. serrata</i>      | 7                    | 1824                 | 540.7                  | S           |
| <i>E. tucumanensis</i> | 387                  | 2063                 | 1378.1                 | C           |
| <i>E. virgata</i>      | 4                    | 2291                 | 1102.6                 | S           |

**Table S3:** Values obtained from the reconstruction of the ancestral climate for each node in the phylogeny.

| Node | Bio1 | Bio4  | Bio8 | Bio10 | Bio11 | Bio12  | Bio16 | Bio18 | Bio19 |
|------|------|-------|------|-------|-------|--------|-------|-------|-------|
| 1    | 13.9 | 210.4 | 12.8 | 16.2  | 10.8  | 1095.4 | 510.5 | 254.8 | 304.7 |
| 2    | 14.5 | 215.7 | 12.6 | 16.0  | 10.5  | 1147.1 | 525.7 | 268.5 | 319.8 |
| 3    | 14.5 | 304.0 | 8.2  | 14.4  | 6.6   | 1250.3 | 581.7 | 191.7 | 475.6 |
| 4    | 15.8 | 316.3 | 7.6  | 14.4  | 6.2   | 1296.0 | 605.5 | 179.9 | 515.5 |
| 5    | 14.9 | 322.4 | 7.2  | 14.1  | 5.7   | 1274.2 | 587.7 | 175.6 | 506.1 |
| 6    | 13.3 | 324.8 | 7.5  | 14.6  | 6.2   | 1190.0 | 571.2 | 143.9 | 493.5 |
| 7    | 11.0 | 358.2 | 6.2  | 14.4  | 5.1   | 1165.4 | 577.2 | 119.1 | 523.0 |
| 8    | 11.0 | 389.7 | 4.9  | 14.0  | 3.9   | 1006.8 | 507.9 | 95.3  | 469.7 |
| 9    | 12.5 | 360.1 | 6.0  | 14.7  | 5.3   | 1299.5 | 652.7 | 118.1 | 605.9 |
| 10   | 12.5 | 329.7 | 5.9  | 12.5  | 3.9   | 1399.0 | 585.3 | 230.4 | 512.4 |
| 11   | 14.3 | 306.4 | 8.0  | 14.3  | 6.4   | 1221.7 | 567.2 | 190.6 | 461.7 |
| 12   | 14.4 | 293.2 | 8.6  | 14.4  | 6.9   | 1207.6 | 557.0 | 203.2 | 437.5 |
| 13   | 14.4 | 251.6 | 10.5 | 14.7  | 8.3   | 1091.2 | 478.5 | 240.2 | 319.6 |
| 14   | 16.3 | 294.4 | 11.3 | 15.6  | 8.1   | 928.5  | 404.9 | 224.6 | 262.5 |
| 15   | 16.0 | 291.1 | 14.9 | 17.0  | 9.6   | 942.0  | 369.4 | 304.5 | 182.2 |
| 16   | 16.3 | 296.7 | 17.3 | 18.8  | 11.2  | 1155.4 | 437.2 | 390.6 | 201.1 |
| 17   | 16.3 | 297.8 | 18.3 | 19.7  | 12.1  | 1358.7 | 472.1 | 439.4 | 253.4 |
| 18   | 16.3 | 313.7 | 19.3 | 21.1  | 13.1  | 1426.1 | 484.6 | 455.5 | 266.6 |
| 19   | 17.0 | 300.0 | 18.4 | 19.4  | 11.8  | 1163.0 | 462.0 | 418.6 | 176.0 |
| 20   | 12.8 | 324.9 | 19.3 | 20.0  | 11.7  | 973.7  | 430.9 | 390.7 | 110.5 |
| 21   | 9.5  | 388.2 | 20.6 | 21.1  | 11.1  | 783.2  | 373.0 | 351.2 | 59.1  |
| 22   | 9.5  | 267.7 | 18.6 | 19.6  | 12.7  | 1458.1 | 545.8 | 502.5 | 236.5 |
| 23   | 9.1  | 260.7 | 18.0 | 19.3  | 12.4  | 1557.9 | 554.4 | 514.0 | 274.0 |
| 24   | 10.0 | 124.8 | 12.1 | 13.7  | 10.6  | 1160.7 | 471.4 | 319.1 | 228.4 |
| 25   | 10.0 | 350.2 | 6.0  | 14.1  | 5.1   | 1412.0 | 693.3 | 154.4 | 624.9 |
| 26   | 8.7  | 174.1 | 14.8 | 16.6  | 12.2  | 1121.4 | 505.2 | 313.7 | 249.5 |
| 27   | 10.6 | 157.3 | 15.4 | 16.5  | 12.6  | 1067.0 | 488.6 | 322.8 | 200.2 |
| 28   | 10.2 | 104.9 | 14.6 | 15.3  | 12.7  | 1058.3 | 466.8 | 299.5 | 217.1 |
| 29   | 10.6 | 104.9 | 13.8 | 14.1  | 11.5  | 853.2  | 403.2 | 305.7 | 105.0 |
| 30   | 14.7 | 137.0 | 16.9 | 17.7  | 14.3  | 1164.5 | 499.6 | 367.9 | 217.9 |
| 31   | 15.0 | 206.4 | 13.0 | 16.3  | 11.1  | 1056.6 | 499.1 | 244.5 | 293.4 |
| 32   | 14.5 | 153.9 | 14.5 | 16.1  | 12.3  | 1027.7 | 468.0 | 289.8 | 210.4 |
| 33   | 13.4 | 96.1  | 14.6 | 15.3  | 13.0  | 1052.3 | 456.9 | 304.0 | 181.1 |
| 34   | 16.3 | 159.1 | 16.0 | 16.8  | 12.8  | 974.2  | 448.0 | 320.9 | 156.9 |

**Table S4:** Weighted PNO values for each species in the 9 bioclimatic variables analyzed.

| <b>Specie</b>          | <b>Bio 1</b> | <b>Bio 4</b> | <b>Bio 8</b> | <b>Bio 10</b> | <b>Bio 11</b> | <b>Bio 12</b> | <b>Bio 16</b> | <b>Bio 18</b> | <b>Bio 19</b> |
|------------------------|--------------|--------------|--------------|---------------|---------------|---------------|---------------|---------------|---------------|
| <i>E. alpina</i>       | 7.1          | 398.5        | 3.5          | 12.3          | 2.0           | 1038.1        | 479.9         | 123.9         | 447.7         |
| <i>E. angustifolia</i> | 8.4          | 265.5        | 8.9          | 11.4          | 4.6           | 101.8         | 62.6          | 40.1          | 26.7          |
| <i>E. bifida</i>       | 17.0         | 295.8        | 17.7         | 20.6          | 13.3          | 1484.5        | 508.5         | 487.3         | 271.1         |
| <i>E. callcottiae</i>  | 13.9         | 231.8        | 12.3         | 16.9          | 11.0          | 1011.4        | 503.5         | 123.1         | 367.3         |
| <i>E. cordobensis</i>  | 15.7         | 471.4        | 21.2         | 21.7          | 9.5           | 642.5         | 297.3         | 291.4         | 34.8          |
| <i>E. discolor</i>     | 15.8         | 52.3         | 15.6         | 16.4          | 15.1          | 1459.7        | 572.4         | 263.8         | 458.4         |
| <i>E. farinacea</i>    | 17.4         | 249.5        | 19.9         | 20.3          | 14.0          | 1553.8        | 612.3         | 563.2         | 222.1         |
| <i>E. florida</i>      | 9.1          | 383.9        | 4.8          | 14.2          | 4.3           | 1407.2        | 734.7         | 105.4         | 690.4         |
| <i>E. gayana</i>       | 10.6         | 347.7        | 6.9          | 15.2          | 6.3           | 1633.7        | 813.1         | 142.8         | 761.8         |
| <i>E. herrerae</i>     | 14.1         | 81.1         | 13.5         | 13.8          | 11.9          | 960.8         | 431.8         | 307.7         | 95.7          |
| <i>E. hypoglauca</i>   | 16.3         | 247.9        | 18.5         | 19.0          | 12.8          | 976.6         | 484.6         | 414.1         | 82.5          |
| <i>E. illinita</i>     | 9.8          | 386.7        | 5.6          | 14.7          | 4.7           | 575.9         | 328.5         | 33.4          | 308.6         |
| <i>E. laevis</i>       | 16.0         | 232.0        | 17.8         | 18.7          | 12.3          | 1588.2        | 630.2         | 571.4         | 225.3         |
| <i>E. ledifolia</i>    | 15.3         | 268.2        | 18.3         | 18.6          | 11.8          | 1630.2        | 516.6         | 504.6         | 331.4         |
| <i>E. leucantha</i>    | 9.4          | 356.5        | 5.4          | 14.0          | 4.7           | 1506.7        | 734.2         | 141.6         | 692.7         |
| <i>E. megapotamica</i> | 17.1         | 324.6        | 19.5         | 21.6          | 13.3          | 1506.0        | 485.1         | 456.4         | 298.5         |
| <i>E. micrantha</i>    | 14.7         | 52.9         | 13.0         | 13.3          | 12.1          | 1041.0        | 435.4         | 299.6         | 202.8         |
| <i>E. millegrana</i>   | 17.9         | 270.6        | 20.5         | 20.9          | 14.1          | 853.8         | 440.6         | 373.4         | 57.3          |
| <i>E. myrtilloides</i> | 12.7         | 69.7         | 12.6         | 12.9          | 11.4          | 1402.7        | 552.0         | 402.1         | 260.7         |
| <i>E. myrtoidea</i>    | 9.8          | 412.3        | 5.2          | 15.2          | 4.5           | 816.9         | 466.5         | 42.9          | 438.5         |
| <i>E. paniculata</i>   | 16.7         | 52.6         | 16.5         | 16.9          | 15.8          | 1624.4        | 617.2         | 441.2         | 342.3         |
| <i>E. pendula</i>      | 16.0         | 53.4         | 15.7         | 16.1          | 14.8          | 1168.5        | 470.9         | 314.5         | 237.2         |
| <i>E. petrophila</i>   | 16.1         | 282.3        | 17.7         | 19.6          | 12.3          | 1627.4        | 487.3         | 468.2         | 360.2         |
| <i>E. piurensis</i>    | 14.2         | 80.2         | 14.8         | 15.0          | 12.9          | 700.7         | 327.7         | 291.0         | 53.1          |
| <i>E. polifolia</i>    | 13.0         | 53.1         | 13.3         | 13.5          | 12.2          | 988.2         | 383.5         | 314.9         | 104.8         |
| <i>E. pulverulenta</i> | 12.6         | 352.1        | 8.8          | 17.2          | 8.2           | 1027.0        | 558.2         | 77.7          | 508.1         |
| <i>E. resinosa</i>     | 11.8         | 129.7        | 11.8         | 12.1          | 9.0           | 800.6         | 415.0         | 326.6         | 44.6          |
| <i>E. reticulata</i>   | 17.7         | 184.4        | 19.5         | 19.6          | 15.0          | 747.8         | 376.3         | 348.9         | 61.9          |
| <i>E. revoluta</i>     | 11.6         | 365.6        | 6.5          | 15.8          | 5.9           | 1226.4        | 646.5         | 93.7          | 601.9         |
| <i>E. rosea</i>        | 8.8          | 373.6        | 4.6          | 13.8          | 4.1           | 1621.4        | 788.2         | 154.7         | 746.8         |
| <i>E. rubra</i>        | 9.7          | 355.9        | 5.4          | 14.0          | 4.6           | 1511.4        | 690.5         | 176.0         | 647.1         |
| <i>E. schreiteri</i>   | 16.4         | 228.5        | 18.4         | 18.9          | 13.1          | 975.4         | 498.9         | 387.5         | 67.8          |
| <i>E. serrata</i>      | 5.5          | 310.9        | 5.0          | 9.4           | 1.4           | 1411.2        | 477.6         | 339.5         | 384.0         |
| <i>E. tucumanensis</i> | 17.3         | 368.3        | 21.2         | 21.6          | 12.2          | 733.3         | 390.8         | 371.3         | 32.0          |
| <i>E. virgata</i>      | 7.8          | 384.1        | 4.2          | 12.7          | 2.9           | 1149.6        | 546.4         | 122.4         | 513.5         |

**Table S5:** Paleoclimatic estimates of mean annual temperature and annual precipitation for fossil localities in Chile and Argentina.

| Locality                    | Country                   | Age (My)                                | Mean anual temperature (°C)                 | Annual precipitation (mm)                                      |
|-----------------------------|---------------------------|-----------------------------------------|---------------------------------------------|----------------------------------------------------------------|
| Laguna del Hunco            | Patagonia, Argentina      | 52<br>(Wilf et al., 2003)               | 17.2 (±2.3)<br>(Wilf et al., 2003)          | 1673 (± 426)<br>(Wilf et al., 2003)                            |
| Quinamávida                 | VII - IX<br>Región, Chile | 46 – 45<br>(Flynn et al., 2008)         | 18.3 (±2.1)<br>(Hinojosa, 2005)             | 888 (± 426)<br>(Hinojosa, 2005)                                |
| Río Turbio                  | Patagonia, Argentina      | 44.6 – 34<br>(Guerstein et al. 2010)    | 17.7 (±2.1)<br>(Hinojosa, 2005)             | 2514 (± 426)<br>(Hinojosa, 2005)                               |
| Río Leona                   | Patagonia, Chile          | 35 – 31<br>(Gutiérrez, 2017)            | 9.2 (±2.1)<br>(Gutiérrez, 2017)             | 820 (± 470)<br>(Gutiérrez, 2017)                               |
| Navidad – Goterones-Matanza | V Región, Chile           | 22.1 – 18.9<br>(Gutiérrez et al., 2013) | 15.6 (±2.4)<br>(Hinojosa, 2005)             | 1149 (+136/-122)<br>(Hinojosa, 2005;<br>Hinojosa et al., 2015) |
| Navidad – Cerro Los Pololos | VI Región, Chile          | 12.8<br>(Gutiérrez et al., 2013)        | 17.7 (±2.8)<br>(Pino, 2016; Hinojosa, 2015) | 888 (+349/-576)<br>(Pino, 2016;<br>Hinojosa, 2015)             |

**Table S6:** Results from ancestral area reconstruction models. The value of the best-fitting model, according to the value of LnL and weighted AIC (AIC wt), are indicated in bold.

| Model         | LnL           | Num.<br>parameters | d<br>(dispersion) | e<br>(extinction) | j<br>(jumps) | AIC   | AIC wt      |
|---------------|---------------|--------------------|-------------------|-------------------|--------------|-------|-------------|
| DEC           | <b>-49.48</b> | 2                  | 0.0084            | 1.00E-12          | 0            | 103   | <b>0.65</b> |
| DEC+J         | -49.13        | 3                  | 0.0073            | 1.00E-12          | 0.02         | 104.3 | 0.34        |
| DIVALIKE      | -56.04        | 2                  | 0.01              | 1.00E-12          | 0            | 116.1 | 0.0009      |
| DIVALIKE+J    | -53.09        | 3                  | 0.0078            | 1.00E-12          | 0.021        | 112.2 | 0.0065      |
| BAYAREALIKE   | -62.54        | 2                  | 0.011             | 0.025             | 0            | 129.1 | 1.40E-06    |
| BAYAREALIKE+J | -55.09        | 3                  | 0.0049            | 0.0084            | 0.031        | 116.2 | 0.0009      |
